# Supplementary material for: Complexes of functionally modified hydrazone ligands—square, rectangular (M4), trigonal bipyramidal (M5) and pin-wheel (M6) motifs
Source: Royal Society of Chemistry journal article supplement (doi:10.1039/c1dt10047e), 2011-01-01

Supplementary information

Fig. S1. Extended  $\pi$  associations in **1**.

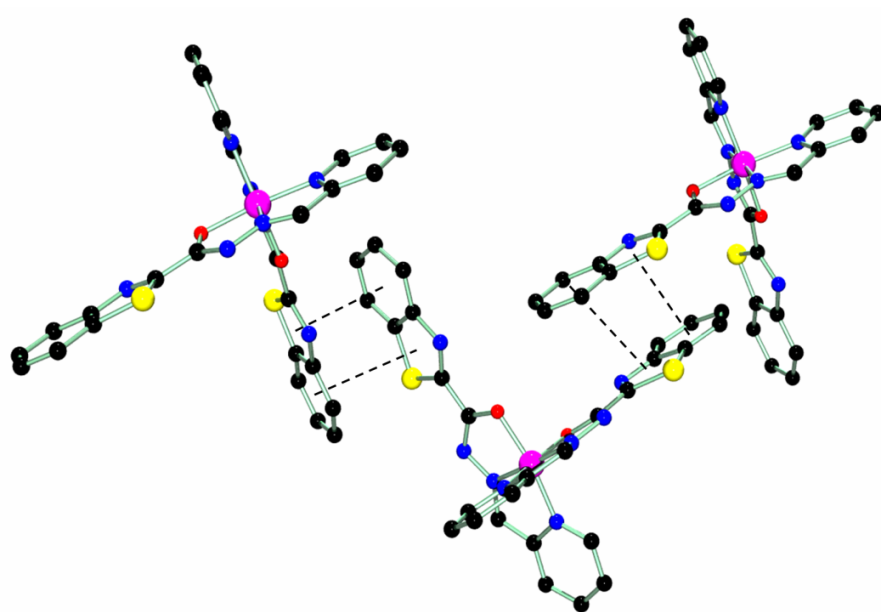

Fig. S2. Energy state spectrum for  $\text{Cu}_6$  exchange model in complex **8**.

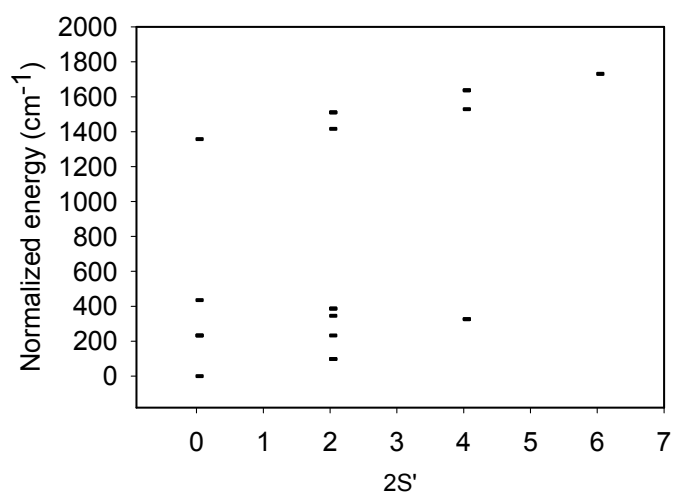

Supplement: c1dt10047e.pdf [file c1dt10047e.pdf]
